# Supplementary material
Source: PubMed Central journal article supplement (PMC29839)
Supplement: nar_29_1_300__1.pdf [file nar_29_1_300__1.pdf]

SUPPLEMENTARY MATERIAL

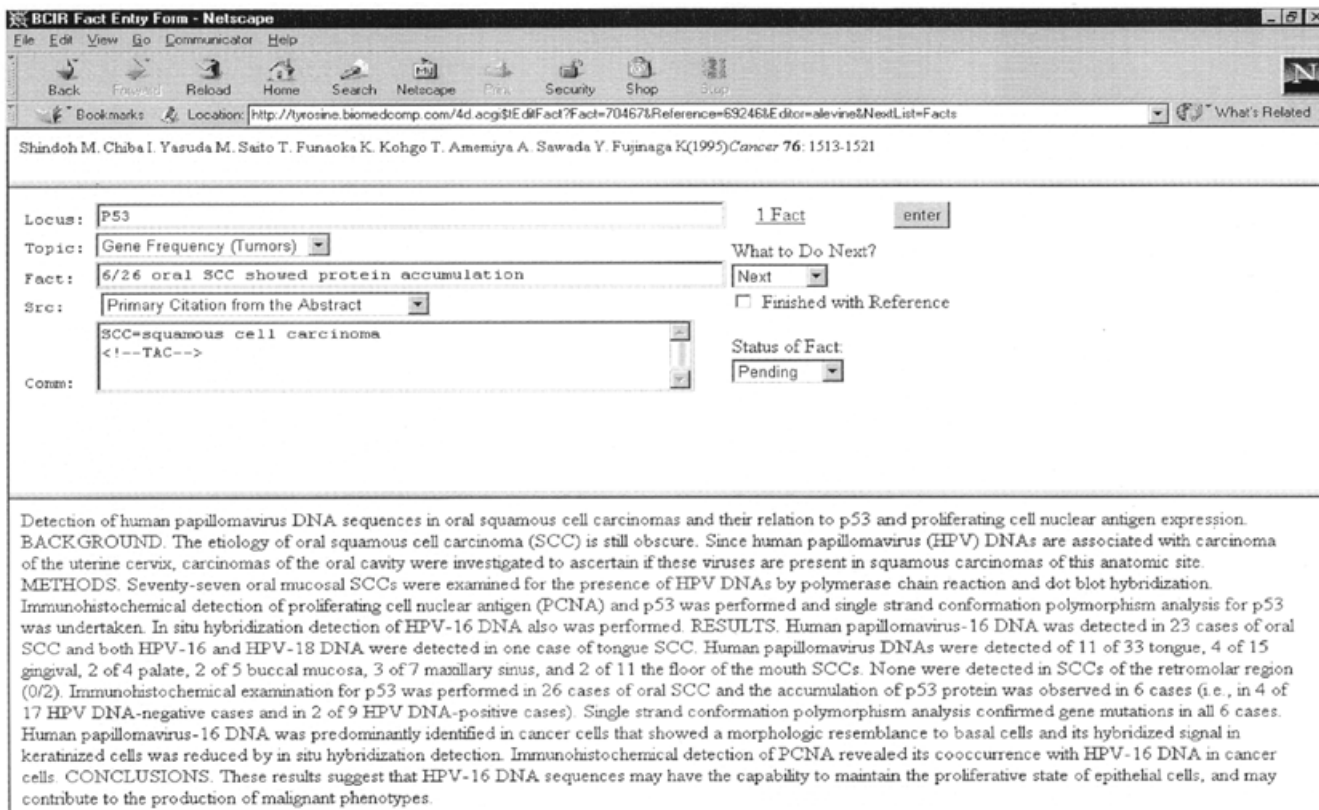

**Figure S1.** Data entry screen for OrCGDB. Gene locus is entered and a topic is selected from the dropdown menu. The curator then enters a fact and comment (if needed), selects the source of the fact, and the status of the fact (pending, revise, publish). By choosing the 'What...next?' button the curator can enter another fact from this reference, go to the next reference or return to the reference list. Note that a fact is entered for this reference under the gene name 'P53' and the topic 'Gene Frequency (Tumors)'.

**Table S1.** Topics used in the Oral Cancer Gene Database

| Topic                     | Definition                                                                                                                                                           |
|---------------------------|----------------------------------------------------------------------------------------------------------------------------------------------------------------------|
| Biochemical type          | Functional biochemical class to which a protein belongs                                                                                                              |
| Cell cycle                | Describes cell cycle-dependent regulation and expression of a gene or its product                                                                                    |
| Cell location             | Normal or aberrant cellular location of a wild-type or mutant protein                                                                                                |
| Cell type distribution    | Type of tissue or cell in which the gene is expressed                                                                                                                |
| Chromosome, human         | Cytogenetic location on human chromosome                                                                                                                             |
| Chromosome, mouse         | Cytogenetic location on mouse chromosome                                                                                                                             |
| Chromosome, other         | Cytogenetic location on chromosome from species other than mouse or human                                                                                            |
| <i>Cis</i> -acting effect | Insertion, deletion, translocation or proviral integration at one locus affects another in a <i>CIS</i> fashion                                                      |
| Clinical                  | Broad categorization of features associated with a given gene                                                                                                        |
| Complementation           | Two genes complement each other for transformation, when each alone would not                                                                                        |
| Development               | Role of a gene, or its expression pattern, during normal development of an organ or organism                                                                         |
| DNA binding               | Specific binding interaction of a gene product with a DNA sequence                                                                                                   |
| DNA structure             | Characteristics of the gene (exons, gene size, regulatory sites, etc.)                                                                                               |
| Function                  | Physiological role of the gene product during normal or tumorigenic growth                                                                                           |
| Gene frequency, normal    | Frequency of a specific polymorphism of a given gene in the normal population                                                                                        |
| Gene frequency, tumor     | Frequency of tumors that carry mutations in the given gene                                                                                                           |
| Homologue                 | Orthologous or paralogous genes identified usually on the basis of sequence similarity                                                                               |
| Ligand binding            | Protein binding to cofactors, substrates or other proteins                                                                                                           |
| Oncogenic activation      | Mechanism that converts a normal gene into one involved in carcinogenesis                                                                                            |
| Oncogenicity              | Proof or line of evidence that a particular gene is oncogenic or involved in maintenance or progression of a tumor                                                   |
| Other                     | Category for facts that cannot fit into any other category; periodically reevaluated                                                                                 |
| Phenotype                 | Effect of a gene, normal or mutated, on an observable property of the whole organism, organ, tissue or cell                                                          |
| Protein binding           | Protein–protein interaction in which there is biochemical or genetic proof of physical association                                                                   |
| Protein size              | Molecular weight or number of amino acids in a given protein                                                                                                         |
| Protein structure         | Information pertaining to the primary, secondary, tertiary or quaternary structure of a protein, the existence of specific motifs or post-translational modification |
| Regulation                | Regulation of the gene or gene products                                                                                                                              |
| RNA structure             | Characteristics of the mRNA encoding a gene                                                                                                                          |
| Signaling pathway         | Pathway(s) in which the gene product is involved                                                                                                                     |
| Tumor gene type           | Oncogene or tumor suppressor                                                                                                                                         |
| Tumor incidence           | Fraction of mutation carriers that will develop a tumor                                                                                                              |
| Tumor type                | Kind of tumors that result from mutations of the gene                                                                                                                |
